# Supplementary material
Source: PubMed Central journal article supplement (PMC3829572)
Supplement: supp_kft186_toxsci_13_0221_File008_SUPPL.pdf [file supp_kft186_toxsci_13_0221_File008_SUPPL.pdf]

# **A New Player in Environmentally Induced Oxidative Stress: Polychlorinated Biphenyl Congener, 3,3' dichlorobiphenyl (PCB11)**

Yueming Zhu<sup>\*</sup>, Kranti A. Mapuskar<sup>†</sup>, Rachel F. Marek<sup>‡</sup>, Wenjin Xu<sup>†</sup>, Hans-Joachim Lehmler<sup>†</sup>, Larry W. Robertson<sup>†</sup>, Keri C. Hornbuckle<sup>‡</sup>, Douglas R. Spitz<sup>\*</sup>, and Nukhet Aykin-Burns<sup>\*§</sup>

<sup>\*</sup> *Free Radical and Radiation Biology Program, B180 Medical Laboratories, Department of Radiation Oncology, Holden Comprehensive Cancer Center, University of Iowa, Iowa City, Iowa 52242, USA.*

<sup>†</sup> *Occupational and Environmental Health, University of Iowa, Iowa City, Iowa 52242, USA.*

<sup>‡</sup> *Civil and Environmental Engineering, 4105 Seamans Center for the Engineering Arts and Sciences, University of Iowa, Iowa City, Iowa 52242, USA.*

<sup>§</sup> *Division of Radiation Health, Department of Pharmaceutical Sciences, College of Pharmacy, 4301 West Markham #522-10, University of Arkansas for Medical Sciences, Little Rock, Arkansas, 72205, USA.*

## Supplemental Methods:

**Synthesis and structural verification of methoxylated PCB 11 standards.** Four methoxylated standards of PCB 11 were synthesized using the Suzuki coupling reaction of 3-chlorobenzene boronic acid with an appropriate methoxybenzene as described previously (Song *et al.*, 2008; Lehmler and Robinson 2001). 3,3'-Dichlorobiphenyl-4-ol was synthesized by demethylation of the corresponding 3,3'-dichloro-4-methoxybiphenyl with  $\text{BBr}_3$  (Lehmler and Robinson 2001). Melting points were measured on a Mel-Temp melting point apparatus and are uncorrected. The NMR spectra were recorded in  $\text{CDCl}_3$  on a Bruker Avance DRX-400 spectrometer in the University of Iowa Central NMR Research Facility (Iowa City, IA, USA). Gas chromatography-mass spectrometry (GC-MS) analyses were performed on an Agilent 6890N gas chromatograph coupled with an Agilent 5975 inert mass selective detector (Agilent Technologies, CA, USA) as reported earlier (Telu *et al.*, 2010). Only the isotopic ion with the lowest mass is reported for all fragments observed in the mass spectra. High resolution mass spectra were recorded by the High Resolution Mass Spectrometry Facility of the University of California Riverside (Riverside, CA, USA). Combustion analyses were performed by Atlantic Microlab Inc. (Atlanta, GA, USA).

**3,3'-Dichloro-2-methoxybiphenyl.** Prepared by coupling of 3-chlorobenzene boronic acid (0.58 g, 3.8 mmol) with 1-bromo-3-chloro-2-methoxybenzene (0.55 g, 2.5 mmol) (Lehmler and Robinson 2001) and purified by column chromatography over silica gel with n-hexanes/ $\text{CHCl}_3$  (6:1, v/v) as eluent. Yield: 0.60 g (61%). Colorless oil.  $^1\text{H}$  NMR (400 MHz,  $\text{CDCl}_3$ ):  $\delta$ /ppm 7.54 (br s, 1H), 7.43-7.38 (m, 1H), 7.34-7.27 (m, 3H), 7.15 (dd,  $J = 8.0$  Hz,  $J \sim 1.6$  Hz, 1H), 7.07-7.02 (pseudo t,  $J \sim 7.8$  Hz, 1H), 3.49 (s, 3H).  $^{13}\text{C}$  NMR (100 MHz,  $\text{CDCl}_3$ ):  $\delta$ /ppm 153.5, 139.4, 135.5, 134.2, 130.1, 129.6, 129.3, 129.2, 128.8, 127.7, 127.3, 125.0, 60.6. Mass spectrum  $m/z$

(relative intensity, %): 252 (70,  $M^+$ ), 217 (24), 202 (100), 182 (20), 173 (14), 152 (16), 139 (23).

HRMS:  $m/z$   $[M]^+$  calculated for  $C_{13}H_{10}OCl_2$  252.0103; found 252.0104. Anal. Calcd for  $C_{13}H_{10}Cl_2O$ : C, 61.68; H, 3.98. Found: C, 61.94; H, 3.97.

**3,3'-Dichloro-4-methoxybiphenyl.** Prepared by coupling of 3-chlorobenzene boronic acid (1.88 g, 12 mmol) with 4-bromo-2-chloro-1-methoxybenzene (2.21 g, 10 mmol) (Lehmeler and Robinson 2001) and purified by column chromatography over silica gel with n-hexanes/ $CHCl_3$  (9:1,  $v/v$ ) as eluent. Yield: 1.13 g (45%); White solid. Mp = 44-45°C.  $^1H$  NMR (400 MHz,  $CDCl_3$ ):  $\delta/ppm$  7.56 (d,  $J = 2.2$  Hz, 1H), 7.48 (br s, 1H), 7.42–7.23 (m, 4H), 6.96 (d,  $J = 8.5$  Hz, 1H), 3.92 (s, 3H).  $^{13}C$  NMR (100 MHz,  $CDCl_3$ ):  $\delta/ppm$  155.0, 141.5, 134.9, 133.3, 130.2, 128.9, 127.3, 126.9, 126.4, 125.0, 123.0, 112.4, 56.4. Mass spectrum  $m/z$  (relative intensity, %): 252 (100,  $M^+$ ), 237 (54), 209 (36), 173 (12), 139 (23). HRMS:  $m/z$   $[M]^+$  calculated for  $C_{13}H_{10}OCl_2$  252.0103; found 252.0101.

**3',5-Dichloro-3-methoxybiphenyl.** Prepared by coupling of 3-chlorobenzene boronic acid (2.35 g, 15.0 mmol) with 1,3-dichloro-5-methoxybenzene (1.77 g, 10.0 mmol) (Song *et al.*, 2008) and purified by column chromatography over silica gel with n-hexanes/ $CHCl_3$  (12:1,  $v/v$ ) as eluent. Yield: 0.40 g (16%). Colorless oil.  $^1H$  NMR (400 MHz,  $CDCl_3$ )  $\delta/ppm$  7.51-7.50 (m, 1H), 7.36-7.31 (m, 3H), 7.11-7.10 (m, 1H), 6.93-6.92 (m, 1H), 6.90-6.89 (m, 1H), 3.80 (s, 3H).  $^{13}C$  NMR (100 MHz,  $CDCl_3$ )  $\delta/ppm$  160.6, 142.2, 141.5, 135.3, 134.7, 130.1, 128.0, 127.2, 125.2, 119.6, 113.4, 111.5, 55.5. Mass spectrum  $m/z$  (relative intensity, %): 252 (100,  $M^+$ ), 222 (19), 209 (10), 173 (11), 152 (23), 139 (28). HRMS:  $m/z$   $[M]^+$  calculated for  $C_{13}H_{10}OCl_2$  252.0103; found 252.0102. Anal. Calcd for  $C_{13}H_{10}Cl_2O$ : C, 61.68; H, 3.98. Found: C, 61.76; H, 3.85.

**3',5-Dichloro-2-methoxybiphenyl.** Prepared by coupling of 3-chlorobenzene boronic acid

(1.72 g, 11.0 mmol) with 2-bromo-4-chloro-1-methoxybenzene (2.21 g, 10 mmol) (Lehmler and Robinson 2001) and purified by column chromatography over silica gel with n-hexanes/ $\text{CHCl}_3$  (19:1,  $v/v$ ) as eluent. Yield: 0.59 g (24%). Colorless oil.  $^1\text{H}$  NMR (400 MHz,  $\text{CDCl}_3$ ):  $\delta$ /ppm 7.50–7.47 (m, 1H), 7.40–7.25 (m, 5H), 6.91–6.88 (m, 1H), 3.78 (s, 3H).  $^{13}\text{C}$  NMR (100 MHz,  $\text{CDCl}_3$ ):  $\delta$ /ppm 155.2, 139.1, 134.1, 130.8, 130.6, 129.7, 129.5, 128.8, 127.8, 127.7, 125.9, 112.6, 56.0. Mass spectrum  $m/z$  (relative intensity, %): 252 (81,  $\text{M}^+$ ), 237 (5), 217 (9), 202 (100), 182 (13), 173 (12), 152 (8), 139 (23). HRMS:  $m/z$   $[\text{M}]^+$  calculated for  $\text{C}_{13}\text{H}_{10}\text{OCl}_2$  252.0103; found 252.0098. Anal. Calcd for  $\text{C}_{13}\text{H}_{10}\text{Cl}_2\text{O}$ : C, 61.68; H, 3.98. Found: C, 61.83; H, 3.98.

**3,3'-Dichlorobiphenyl-4-ol.** Synthesized from 3,3'-dichloro-4-methoxybiphenyl (0.30 g, 1.2 mmol) by demethylation with  $\text{BBr}_3$  (Lehmler and Robinson 2001). Yield: 0.22 g (72 %). White solid.  $\text{Mp} = 50.5\text{--}52^\circ\text{C}$ .  $^1\text{H}$  NMR (400 MHz,  $\text{CDCl}_3$ ):  $\delta$ /ppm 7.54–7.47 (m, 2H), 7.40–7.26 (m, 4H), 7.07 (d,  $J = 8$  Hz, 1H), 5.62 (br s, 1H).  $^{13}\text{C}$  NMR (100 MHz,  $\text{CDCl}_3$ ):  $\delta$ /ppm 151.4, 141.5, 135.0, 133.7, 130.3, 127.706, 127.5, 127.3, 127.0, 125.0, 120.6, 116.8. Mass spectrum  $m/z$  (relative intensity, %): 238 (100,  $\text{M}^+$ ), 168 (9), 139 (60). HRMS:  $m/z$   $[\text{M}]^+$  calculated for  $\text{C}_{12}\text{H}_8\text{OCl}_2$  237.9947; found 237.9953. Anal. Calcd for  $\text{C}_{12}\text{H}_8\text{Cl}_2\text{O}$ : C, 60.26; H, 3.37. Found: C, 60.47; H, 3.40.

References for Supplemental Methods:

- Song Y, Buettner GR, Parkin S, Wagner BA, Robertson LW, Lehmler HJ. 2008. Chlorination increases the persistence of semiquinone free radicals derived from polychlorinated biphenyl hydroquinones and quinones. *J Org Chem* 73 (21): 8296-8304.
- Lehmler HJ, Robertson LW. 2001. Synthesis of hydroxylated PCB metabolites with the Suzuki-coupling. *Chemosphere* 45(8): 1119-1127.
- Zhao H, Adamcakova-Dodd A, Hu D, Hornbuckle KC, Just CL, Robertson LW, Thorne PS, Lehmler HJ. 2010. Development of a synthetic PCB mixture resembling the average polychlorinated biphenyl profile in Chicago air. *Environ Int* 36(8):819-827.
- Kania-Korwel I, Zhao H, Norstrom K, Li X, Hornbuckle KC, Lehmler HJ. 2008. Simultaneous extraction and clean-up of PCBs and their metabolites from small tissue samples using pressurized liquid extraction. *J. Chromatogr. A* 1214(1-2): 37-46.
- Telu S, Parkin S, Robertson LW, Lehmler HJ. 2010. Improved syntheses of non-dioxin-like polychlorinated biphenyls (PCBs) and some of their sulfur-containing metabolites. *Environ Int* 36(8): 828-834.
